# Supplementary material for: Epidemiological, Clinical, and Genomic Profile in Head and Neck Cancer Patients and Their Families
Source: MDPI journal article supplement (doi:10.3390/biomedicines10123278), 2022-12-17
Supplement: s1 [file s1]

**Table S1.** Description of tumor sites in 18 index patients (evaluated by array-CGH) and their relatives.

| Case | Age/Sex | Tumor site                             | HPV status | Affected family member /tumor location                                                |
|------|---------|----------------------------------------|------------|---------------------------------------------------------------------------------------|
| 2.1  | 47/M    | Buccal mucosa                          | Negative   | sister/breast, uncle/esophagus, other/pancreas                                        |
| 14.1 | 62/M    | Tongue                                 | NA         | brother/ oral cavity, sister/lung                                                     |
| 26.1 | 53/M    | Soft palate                            | Negative   | mother/uterus, sister/colon                                                           |
| 27.1 | 56/M    | Inferior gum                           | Negative   | sister/colon, sister/thyroid                                                          |
| 51.1 | 61/F    | Retromolar area                        | Negative   | father/bladder, brother/prostate, brother/HNC,<br>brother/pancreas, brother/esophagus |
| 53   | 45/M    | Pyriform sinus                         | Negative   | mother/breast, aunts/breast                                                           |
| 58.1 | 55/M    | Inferior lip                           | Negative   | father/tongue                                                                         |
| 61.1 | 68/M    | Floor of the mouth                     | Negative   | mother/breast, son/stomach                                                            |
| 65.1 | 63/F    | Pyriform sinus                         | Negative   | father/larynx, sister/lymphoma, aunt/colon                                            |
| 66   | 61/M    | Tongue+floor of the<br>mouth+jaw       | Negative   | brother/kidney sarcoma                                                                |
| 67.1 | 69/M    | Tonsil                                 | HPV16      | brother/lung                                                                          |
| 72.1 | 73/M    | Base of tongue                         | HPV16      | brother/esophagus                                                                     |
| 74.1 | 51/M    | Base of tongue                         | Negative   | father/prostate, brother and uncle/HNC,<br>mother/pancreas, uncle/colon               |
| 84.1 | 49/M    | Oropharynx                             | NA         | brother/lymphoma, aunt/breast                                                         |
| 168  | 68/M    | Oropharynx                             | Negative   | father/pancreas, cousin/lung                                                          |
| 207  | 74/F    | Tongue                                 | Negative   | father/melanoma, grandmother/cervical cancer                                          |
| 229  | 63/M    | Floor of the<br>mouth+alveolar<br>edge | Negative   | brother/unknown                                                                       |
| 339  | 61/M    | Floor of the<br>mouth+tongue<br>+gum   | Negative   | brother/esophagus                                                                     |

HPV: human papilloma virus; HNC: head and neck cancer; NA: not available
